1 **Temperature-induced changes in wheat phosphoproteome reveal temperature-regulated**  
2 **interconversion of phosphoforms**

3

4 Lam Dai Vu<sup>1,2,3,4,\*</sup>, Tingting Zhu<sup>1,2,3,4,\*</sup>, Inge Verstraeten<sup>1,2,§</sup>, Brigitte van de Cotte<sup>1,2,</sup>  
5 IWGSC<sup>5</sup>, Kris Gevaert<sup>3,4,#</sup>, Ive De Smet<sup>1,2,#,\$</sup>

6

7 <sup>1</sup>Ghent University, Department of Plant Biotechnology and Bioinformatics, B-9052 Ghent,  
8 Belgium

9 <sup>2</sup>VIB Center for Plant Systems Biology, B-9052 Ghent, Belgium

10 <sup>3</sup>Department of Biochemistry, Ghent University, B-9000 Ghent, Belgium

11 <sup>4</sup>VIB-UGent Center for Medical Biotechnology, B-9000 Ghent, Belgium

12 <sup>5</sup>Lee's Summit, Missouri, USA

13

14 <sup>§</sup>Current address: Institute of Science and Technology Austria, 3400 Klosterneuburg, Austria

15

16 \*Equal contribution

17 #Equal contribution

18

19 <sup>\$</sup>Corresponding author

20

21

22

23

24

25

26 **ABSTRACT**

27 Wheat (*Triticum* ssp.) is one of the most important human food sources. However, this crop is  
28 very sensitive to temperature changes. Specifically, processes during wheat leaf, flower and  
29 seed development and photosynthesis, which all contribute to the yield of this crop, are  
30 affected by high temperature. While this has to some extent been investigated on  
31 physiological, developmental and molecular levels, very little is known about early signalling  
32 events associated with an increase in temperature. Phosphorylation-mediated signalling  
33 mechanisms, which are quick and dynamic, are associated with plant growth and  
34 development, also under abiotic stress conditions. Therefore, we probed the impact of a short-  
35 term increase in temperature on the wheat leaf and spikelet phosphoproteome. The resulting  
36 data set provides the scientific community with a first large-scale plant phosphoproteome  
37 under the control of higher ambient temperature, which will be valuable for future studies.  
38 Our analyses also revealed a core set of common proteins between leaf and spikelet,  
39 suggesting some level of conserved regulatory mechanisms. Furthermore, we observed  
40 temperature-regulated interconversion of phosphoforms, which likely impacts protein activity.

41

42

43 **KEYWORDS**

44 Wheat, Temperature, Phosphorylation, Signalling, Leaf, Spikelet, Phosphoproteomics

45

46

47

48

49

50

51 **INTRODUCTION**

52

53 Wheat (*Triticum* spp.) is one of the most important staple food crops around the world  
54 (Hawkesford *et al.*, 2013). However, the current production of wheat is predicted to be not  
55 sufficient to satisfy the future demands of the increasing world's population (Hawkesford *et*  
56 *al.*, 2013; Mochida and Shinozaki, 2013; International Wheat Genome Sequencing  
57 Consortium (IWGSC), 2014). In addition, the global temperature is predicted to rise  
58 throughout the 21<sup>st</sup> century (IPCC, 2014); and it has been estimated that for each degree (°C)  
59 of temperature increase, global wheat production will reduce by 6% impacting food security  
60 (Asseng *et al.*, 2015).

61 Wheat is sensitive to heat stress during all stages of its growth and development  
62 (Barber *et al.*, 2015; Akter and Rafiqul Islam, 2017). During wheat vegetative development,  
63 traits affected by high temperature include plant height, specific leaf weight, leaf width,  
64 relative water content, chlorophyll content and secondary metabolites (Akter and Rafiqul  
65 Islam, 2017). Furthermore, generative wheat growth and development are also very  
66 susceptible to increased temperatures (Bennett *et al.*, 1971; Sainiab *et al.*, 1983; Saini *et al.*,  
67 1984; Draeger and Moore, 2017). Specifically, when wheat flowers are exposed to heat stress  
68 (10°C above the optimum condition) at the stage between ear initiation and anthesis (when  
69 anther development goes through meiosis) this causes abnormal development of the pollen  
70 grains in the anther and subsequently results in grain yield reduction (Sainiab *et al.*, 1983;  
71 Saini *et al.*, 1984; Fischer, 1985; Wardlaw *et al.*, 1989).

72 So far, transcriptome and proteome profiles were investigated in wheat under heat  
73 stress, revealing differences in gene expression and protein levels, respectively (Liu *et al.*,  
74 2015; Wang *et al.*, 2016; Zhang *et al.*, 2017). Often, changes in gene expression for enzymes  
75 were in line with changes in the metabolite profiles upon stress (Rizhsky, 2004). Different

76 metabolites, including organic acids, amino acids, polyols and lipidic compounds, which are  
77 beneficial for the plant during heat stress and known to protect the photosynthesis system, are  
78 enhanced in conditions of elevated temperature (Guy *et al.*, 2008; Scalabrin *et al.*, 2015; Qi *et*  
79 *al.*, 2017).

80 Several protein post-translational modifications (PTMs) are linked with plant stresses;  
81 but, these PTMs are hardly investigated in the context of temperature stress (Wu *et al.*, 2016;  
82 Hashiguchi and Komatsu, 2016). For example, protein phosphorylation is involved in the  
83 regulation of a large number of processes, including abiotic stress signalling (Kline *et al.*,  
84 2010; Bonhomme *et al.*, 2012; Nguyen *et al.*, 2012; Zhang *et al.*, 2014*a,b*; Kanshin *et al.*,  
85 2015). However, little is known about the phosphoproteome differences in the important crop  
86 wheat in vegetative and reproductive organs and during development under high temperature  
87 (Kumar *et al.*, 2017). Nevertheless, understanding PTM-mediated signalling cascades  
88 associated with an elevated temperature response is essential to gain insight in temperature  
89 tolerance and to facilitate future breeding (Rampitsch and Bykova, 2012).

90 Here, we monitored phosphorylation events in leaves of wheat seedlings and wheat  
91 spikelets exposed for 1h to higher temperature, and further analysed the data for biological  
92 processes potentially affected by phosphorylation. The information presented here not only  
93 improved our understanding about the role of protein phosphorylation in wheat under high  
94 temperature stress, but also provided a large number of phosphorylation sites for potentially  
95 critical proteins in this process. Furthermore, we observed temperature-regulated  
96 interconversion of phosphoforms, especially of neighbouring phosphosites, which likely  
97 impacts protein activity.

98

99 **MATERIAL AND METHODS**

100

101 ***Wheat Plant Materials and Growth Conditions***

102 The seeds used in this study were from two bread wheat (*T. aestivum*, AABBDD,  $2n = 6x =$   
103 42) cultivars, Fielder and Cadenza. The seeds were put on wet paper enclosed by plastic wrap  
104 and vernalized as such at 4°C for 3-4 days, and then transferred to room temperature for  
105 germination. Seeds that germinated uniformly were selected and grown in plastic pots  
106 containing soil at 21°C (Cadenza) or 24°C (Fielder) under 16 h light/8 h dark ( $100 \mu\text{E m}^{-2}\text{s}^{-1}$   
107 photosynthetically active radiation, supplied by cool-white fluorescent tungsten tubes, Osram),  
108 and 65–75% air humidity.

109

110 ***Temperature Treatment***

111 Temperature treatment was performed 8 h after the start of the light period. For the leaf  
112 material, Fielder plants at 7 days post germination growing in separate pots were transferred  
113 to two incubators and grown at 34°C (high temperature treatment) or 24°C (control  
114 temperature) under constant light ( $100 \mu\text{E m}^{-2}\text{s}^{-1}$  photosynthetically active radiation) for 60  
115 min. For the spikelet samples, Cadenza plants were cultivated in the greenhouse until the  
116 booting stage (stage 45 in Zadoks Decimal Code), then transferred to two incubators at  
117 respectively 34°C (high temperature treatment) and 21°C (control temperature) under constant  
118 light ( $100 \mu\text{E m}^{-2}\text{s}^{-1}$  photosynthetically active radiation) for 60 min. The leaves of seedlings  
119 from Fielder and the spikelets in the middle section of the ears from Cadenza were collected  
120 and frozen in liquid nitrogen.

121

122 ***qRT-PCR***

123 Three biological replicates were used per time point. RNA was extracted and purified with the  
124 RNeasy Mini Kit (Qiagen) according to the manufacturer's instruction for plant RNA  
125 extraction. DNA digestion was done on columns with RNase-free DNase I (Promega). The  
126 iScript cDNA Synthesis Kit (Biorad) was used for cDNA synthesis from 1 µg of RNA. qRT-  
127 PCR was performed on a LightCycler 480 (Roche Diagnostics) in 384-well plates with  
128 LightCycler 480 SYBR Green I Master (Roche) according to the manufacturer's instructions.  
129 Two housekeeping genes, *ACTIN* (GenBank locus AB181991.1) and the *CELL DIVISION*  
130 *CONTROL PROTEIN* (*CDC*, GenBank locus Ta.46201) were used for normalization of the  
131 expression level of the *HEAT SHOCK PROTEINS*. All the primers are listed in **Supplemental**  
132 **Table S1**.

133

#### 134 ***Protein Extraction and Phosphopeptide Enrichment***

135 Total protein extraction was conducted on three biological replicate samples (leaf and spikelet  
136 material from independent plants) per wheat cultivar according to our previously described  
137 procedure with minor modifications (Vu *et al.*, 2017). Details can be found in the  
138 **Supplementary Information**. Phosphopeptides were enriched as previously described (Vu *et*  
139 *al.*, 2017).

140

#### 141 ***LC-MS/MS Analysis***

142 Each sample was analysed via LC-MS/MS on an Ultimate 3000 RSLC nano LC (Thermo  
143 Fisher Scientific, Bremen, Germany) in-line connected to a Q Exactive mass spectrometer  
144 (Thermo Fisher Scientific). The peptides were first loaded on a trapping column (made in-  
145 house, 100 µm internal diameter (I.D.) × 20 mm, 5 µm beads C18 Reprosil-HD, Dr. Maisch,  
146 Ammerbuch-Entringen, Germany). After flushing the trapping column, peptides were loaded  
147 in solvent A (0.1% formic acid in water) on a reverse-phase column (made in-house, 75 µm

148 I.D. x 250 mm, 1.9  $\mu$ m Reprisil-Pur-basic-C18-HD beads, Dr. Maisch, packed in the needle)  
149 and eluted by an increase in solvent B (0.1% formic acid in acetonitrile) using a linear  
150 gradient from 2% solvent B to 55% solvent B in 120 min, followed by a washing step with  
151 99% solvent B, all at a constant flow rate of 300 nl/min. The mass spectrometer was operated  
152 in data-dependent, positive ionization mode, automatically switching between MS and  
153 MS/MS acquisition for the 5 most abundant peaks in a given MS spectrum. The source  
154 voltage was set at 4.1 kV and the capillary temperature at 275°C. One MS1 scan (m/z  
155 400–2,000, AGC target  $3 \times 10^6$  ions, maximum ion injection time 80 ms), acquired at a  
156 resolution of 70,000 (at 200 m/z), was followed by up to 5 tandem MS scans (resolution  
157 17,500 at 200 m/z) of the most intense ions fulfilling predefined selection criteria (AGC target  
158  $5 \times 10^4$  ions, maximum ion injection time 80 ms, isolation window 2 Da, fixed first mass 140  
159 m/z, spectrum data type: centroid, under-fill ratio 2%, intensity threshold  $1.3 \times 10^4$ , exclusion of  
160 unassigned, 1, 5-8, >8 positively charged precursors, peptide match preferred, exclude  
161 isotopes on, dynamic exclusion time 12 s). The HCD collision energy was set to 25%  
162 Normalized Collision Energy and the polydimethylcyclosiloxane background ion at  
163 445.120025 Da was used for internal calibration (lock mass).

164

### 165 ***Database Searching***

166 MS/MS spectra were searched against the unpublished IWGSC RefSeq v1.0 database for  
167 *Triticum aestivum* (137052 entries) ([wheat-urgi.versailles.inra.fr/Seq-Repository/Assemblies](http://wheat-urgi.versailles.inra.fr/Seq-Repository/Assemblies))  
168 with the MaxQuant software (version 1.5.4.1). For comparison, a second search against the  
169 earlier version of IWGSC PopSeq PGSB/MIPS v2.2 database (100344 entries), downloaded  
170 from [wheatproteome.org](http://wheatproteome.org), was performed. Detailed MaxQuant settings can be found in  
171 **Supplementary Information**. All MS proteomics data have been deposited to the  
172 ProteomeXchange Consortium via the PRIDE partner repository (Vizcaíno et al., 2014;

173 Vizcaíno *et al.*, 2016) with the dataset identifier PXD008703. Next, the ‘Phospho(STY).txt’  
174 output file generated by the MaxQuant search was loaded into the Perseus (version 1.5.5.3)  
175 data analysis software available in the MaxQuant package. Proteins that were quantified in at  
176 least two out of three replicates from each temperature were retained. Log<sub>2</sub> protein ratios of  
177 the protein LFQ intensities were centered by subtracting the median of the entire set of protein  
178 ratios per sample. A two-sample test with a *p*-value cut-off  $p < 0.01$  was carried out to test for  
179 differences between the temperatures. Besides, phosphopeptides with 3 valid values in one  
180 condition and none in the other were also retained and designated “unique” for that condition.

181

## 182 ***In Silico Analyses***

183 For Gene Ontology (GO) analysis, the protein sequences of all identified phosphoproteins  
184 were loaded in the BLAST2GO software and blasted against the NCBI non-redundant protein  
185 sequence database of green plants (*Viridiplantae*) with a cut-off E-Value of  $10^{-5}$ . Afterwards,  
186 the results were examined for GO annotation and a Fisher’s exact test ( $p < 0.05$ ) was  
187 performed to extract enriched GO terms in the regulated phosphosite dataset. For Motif-X  
188 analyses, the Motif-X algorithm (Chou and Schwartz, 2011) was used to extract significantly  
189 enriched amino acid motifs surrounding the identified phosphosites. The sequence window  
190 was limited to 13 amino acids and foreground peptides were pre-aligned with the phosphosite  
191 in the centre of the sequence window. All identified proteins were used as the background  
192 dataset. The occurrence threshold was set at the minimum of 20 peptides and the P-value  
193 threshold was set at  $< 10^{-6}$ . Structural modelling of the WD40 domain of *TaSPIRRIG* was  
194 performed in SWISS-MODEL (Arnold *et al.*, 2006; Biasini *et al.*, 2014). The templates for  
195 the modelling studies were identified in the automated mode against the SWISS-MODEL  
196 template library (PDB: 5HYN). Structure representations were generated using the PyMOL  
197 Molecular Graphics System, Version 1.7.4, Schrödinger, LLC ([www.pymol.org](http://www.pymol.org)).



198

## 199 **RESULTS AND DISCUSSION**

200

### 201 *Experimental Set-up for Early Leaf and Spikelet Phosphoproteome Analyses*

202

203 So far, our knowledge on changes in the wheat proteome upon elevated temperature is largely  
204 limited to long-term exposures (day- or week-long treatments) (Majoul *et al.*, 2003; Laino *et*  
205 *al.*, 2010; Farooq *et al.*, 2011). We were interested in early signalling associated with a milder  
206 increase in ambient temperature, and therefore we wanted to profile changes in the  
207 phosphoproteome. To determine a suitable time point for proteome sampling, we first probed  
208 the expression levels of two *HEAT SHOCK PROTEINs*, since early thermal sensing is largely  
209 reflected in the transcription of *HEAT SHOCK PROTEINs* (Xu *et al.*, 2011). Here, we  
210 exposed 7 days old wheat seedlings (Fielder) grown at 24°C for a short-term treatment of  
211 34°C and harvested whole shoots at different incubation times (**Figure 1A**). Recent evidence  
212 in cereal crop plants has demonstrated a link between high temperature sensitivity at booting  
213 stage and seed yield (Hedhly *et al.*, 2009; Draeger and Moore, 2017). Hence, we used booting  
214 wheat plants (Cadenza) grown at 21°C and exposed to increased ambient temperature (34°C),  
215 after which we harvested spikelets at different incubation times (**Figure 1B**). Since  
216 developmental stages differ in optimal growth temperature (Porter and Gawith, 1999), we  
217 chose different optimal growth temperatures as the control condition for our experiment. We  
218 analysed the transcription of *TaHSP70d* and *TaHSP90.1*, which are markers for temperature  
219 response (Xue *et al.*, 2014), in both leaf and spikelet samples. We found that the  
220 transcriptional response of *TaHSP70d* and *TaHSP90.1* peaks in both samples at 60 min,  
221 indicating a maximum of early high temperature response (**Figure 1C-D**). Therefore, to  
222 identify early phosphorylation-controlled signalling components associated with a mild

223 increased temperature in wheat, we subjected both leaf and spikelet samples from the 60 min  
224 time point to our phosphoproteomic workflow (Vu *et al.*, 2016).

225

### 226 *New wheat reference sequence improves protein identification*

227

228 Advances in the wheat reference sequence assembly provide a solid basis for proteome  
229 studies in wheat (Brenchley *et al.*, 2012; International Wheat Genome Sequencing  
230 Consortium (IWGSC), 2014; Luo *et al.*, 2017). Through Ti-IMAC enrichment and subsequent  
231 LC-MS/MS analysis, we identified 3822 phosphopeptides containing 5178 phosphorylated  
232 amino acids, representing 2213 phosphoproteins in the leaf samples using the unpublished  
233 IWGSC RefSeq v1.0 assembly (**Figure 2 and Supplementary Table S2**). In spikelet  
234 samples, our workflow led to the identification of 5581 phosphopeptides containing 7023  
235 phosphosites located on 2696 proteins (**Figure 2 and Supplementary Table S3**). As a  
236 comparison, we performed a second search using the earlier published protein sequence  
237 database based on the draft genome sequences of bread wheat (International Wheat Genome  
238 Sequencing Consortium (IWGSC), 2014). The new protein database, based on the  
239 unpublished IWGSC RefSeq v1.0 assembly, resulted in an increase of 30% and 34% of  
240 identifications compared to the search using the previous search database that identified 3975  
241 and 5234 phosphosites for leaf and spikelet samples, respectively. This seems to correlate  
242 with the increase of 36.5% in the number of entries in the new database compared to the old  
243 database, supporting the quality of the new wheat reference sequence assembly. To our  
244 knowledge, this is currently the largest set of identified phosphosites in the *Triticum* family.  
245 The identified phosphosites in this study were added to our PTMViewer  
246 ([bioinformatics.psb.ugent.be/webtools/ptm\\_viewer/](http://bioinformatics.psb.ugent.be/webtools/ptm_viewer/)) (Vu *et al.*, 2016). In addition, we found

247 several phosphosites that were differentially regulated between normal (21 or 24°C) and  
248 increased ambient temperature (34°C) in wheat leaves and spikelets (**Figure 2**).

249

### 250 *A Temperature-regulated Wheat Leaf Phosphoproteome*

251

252 Phosphosites that exhibited valid values in one condition and none in the other indicate a  
253 massive change in phosphorylation levels. For the wheat leaves, we could identify 13  
254 phosphosites that only occurred in the 34°C samples and 32 phosphosites unique for the 24°C  
255 condition (**Figure 2 and Supplementary Table S4**). On the rest of the wheat leaf dataset, we  
256 performed a Student's t-test ( $p < 0.01$ ) on phosphosites with at least 2 valid values in any  
257 condition (2810 phosphosites), and this resulted in 33 significantly upregulated phosphosites  
258 and 63 significantly downregulated phosphosites at high temperature (**Supplementary Table**  
259 **S5**). Proteins with phosphosites uniquely identified in either conditions and significantly  
260 deregulated phosphoproteins from the statistical test were combined and analysed for  
261 overrepresented GO terms in biological processes (**Figure 3**) and molecular function  
262 (**Supplementary Figure S2**). As expected, upregulated phosphoproteins are highly enriched  
263 in the GO terms of stress-induced processes such as response to heat, protein folding (Zhu,  
264 2016), response to hydrogen peroxide (Gupta *et al.*, 2016) and glucose transport (Ruan *et al.*,  
265 2010). On the other hand, downregulated phosphoproteins were mainly enriched in positive  
266 regulation of translational elongation/termination, and ribosome biogenesis (Cherkasov *et al.*,  
267 2015).

268 Expression of *HSPs* is rapidly induced in the leaf by increased temperature (**Figure**  
269 **1C**), as the resulting proteins play crucial roles when plants are exposed to increased  
270 temperature (Sun *et al.*, 2002; Kotak *et al.*, 2007). In our leaf data set, we furthermore  
271 identified several differential phosphorylation sites of *HSPs* at 34°C (**Supplementary Table**

272 **S4-5**), namely HSP90 (TraesCS2A01G033700.1, *TaHSP90*) and HSP60-3A  
273 (TraesCSU01G009200.1, *TaHSP60-3A*) were 10.4-fold and 4.6-fold upregulated at S224 and  
274 S577, respectively. However, for both proteins, another phosphosite, namely S93 of *TaHSP90*  
275 and T420 of *TaHSP60-3A*, was not differentially phosphorylated after 1 h exposure to 34 °C.  
276 This suggested that HSP90 and HSP60-3A protein abundance is likely not the basis for the  
277 increase in S224 and S577 phosphopeptide increase, respectively.

278 Noticeably, our dataset indicated that the phosphoproteome of the photosynthesis  
279 machinery in wheat leaves is severely affected by high temperature (**Supplementary Tables**  
280 **S4 and S5**). For example, phosphorylation of T33, T37 and T39 of the subunit P of  
281 photosystem I (TraesCS2A01G235000.1) was 3.2-fold downregulated after 1 h exposure to  
282 34°C (**Supplementary Table S5**). In addition, an actin-binding protein  
283 (TraesCS1D01G422700.2), whose homologue in *Arabidopsis* (CHUP1) is important for  
284 proper chloroplast positioning (Oikawa *et al.*, 2008), was found to be considerably less  
285 phosphorylated at S157 upon high temperature (**Supplementary Table S4**). Besides, a  
286 kinesin-like protein (TraesCS7D01G176200.1, homologous to *Arabidopsis* KAC1) is highly  
287 phosphorylated in its kinesin motor domain (S444) in response to high temperature  
288 (**Supplementary Table S4**). Both CHUP1 and KAC1 regulate the accumulation of  
289 chloroplast actin filaments in *Arabidopsis*, thus facilitating the anchorage of chloroplasts on  
290 the plasma membrane. Last, phosphorylation of kinases involved in chloroplast movement  
291 such as the phototropin homologues TraesCS5D01G389200.2 and TraesCS2B01G290500.3  
292 (S525 and S294, respectively) was also elevated by heat (**Supplementary Table S4 and S5**).

293 The post-translational import of chloroplast proteins is a highly regulated process  
294 (Strittmatter *et al.*, 2010). Our dataset shows several components of this process to be affected  
295 by high temperature. Increased temperature also highly induced the phosphorylation of a  
296 wheat homologue (TraesCS5D01G132600.1) of *Arabidopsis* STY46 kinase at S31

297 **(Supplementary Table S4)**. In *Arabidopsis*, STY46 and its homologues STY8 and STY17  
298 facilitate import of chloroplast preproteins by phosphorylation of their N-terminal transit  
299 peptide (Lamberti *et al.*, 2011). On the other hand, many chloroplast proteins are integrated  
300 into the chloroplast outer membrane (COM) without any cleavable signal sequence (Hofmann  
301 and Theg, 2005). The ANKYRIN REPEAT-CONTAINING PROTEIN 2 (AKR2) interacts  
302 with chloroplast specific lipid markers and facilitates the insertion of COM proteins into the  
303 chloroplast outer membrane (Kim *et al.*, 2014). It is speculated that the regulatory mechanism  
304 of this process involves conformational changes of AKR2 via PTMs (Kim *et al.*, 2014). Here,  
305 we showed that phosphorylation of the AKR2 homologue in wheat  
306 (TraesCS4A01G328600.1) at S404 is two-fold upregulated in response to higher temperature  
307 **(Supplementary Table S5)**. While protein import in chloroplasts has been shown to be  
308 altered under stress conditions (Dutta *et al.*, 2009; Ling and Jarvis, 2016), our dataset  
309 indicated that this response, especially to high temperature, is highly regulated by  
310 phosphorylation.

311 In conclusion, our temperature-mediated leaf phosphoproteome pinpointed  
312 photosynthesis as a central target of higher temperature and identified several phosphorylated  
313 residues on key components for further functional characterization.

314

### 315 ***A Temperature-regulated Wheat Spikelet Phosphoproteome***

316

317 For the wheat spikelet, we identified 79 phosphosites that are only present in the 34°C  
318 samples and 51 phosphosites that are unique for 21°C samples (**Figure 2 and**  
319 **Supplementary Table S6**). A Student's t-test ( $p < 0.01$ ) was performed on the rest of the  
320 wheat spikelet dataset (phosphosites with at least 2 valid values in temperature condition;  
321 3949 phosphosites), and this resulted in 114 significantly upregulated phosphosites and 110

322 significantly downregulated phosphosites at elevated temperature (**Supplementary Table**  
323 **S7**). Proteins with phosphosites uniquely identified in either condition and significantly  
324 deregulated phosphoproteins from the statistical test were combined and GO analysis was  
325 performed similarly as for the leaf samples (**Figure 4 and Supplementary Figure S3**). The  
326 biological processes enriched in leaf samples were also increased here, such as protein  
327 folding, response to heat, response to hydrogen peroxide. Similar to the leaf GO enrichment  
328 (**Figure 3**), terms associated with translation were predominantly enriched for downregulated  
329 phosphoproteins.

330 Reproductive development in plants is known to be greatly dependent on the  
331 epigenetic control of expression of flowering genes (Gan *et al.*, 2013). This often involves  
332 histone modifications such as (de)acetylation, methylation and ubiquitination (Lawrence *et*  
333 *al.*, 2016). Here, we found that the phosphorylation of several histone-modifying enzymes  
334 was deregulated in response to heat. For example, the phosphoserine 297 of the histone  
335 deacetylase TraesCS1A01G445700.3 was 7.1-fold downregulated and the phosphorylation of  
336 S762 S763 in the histone-lysine N-methyltransferase TraesCS2A01G262600.1 was 2.4-fold  
337 decreased (**Supplementary Table S7**). In contrast, an ubiquitin protease,  
338 TraesCS4D01G266600.3, was 2.2-fold more phosphorylated at S31 and T32. Its *Arabidopsis*  
339 homologue, *UBP26*, deubiquitinates the histone H2B to regulate floral transition by control  
340 the expression of *FLOWERING LOCUS C (FLC)* (Schmitz *et al.*, 2008). Furthermore, it has  
341 been demonstrated that phosphorylation is crucial for the activity of histone-modifying  
342 enzymes (Pflum *et al.*, 2001; Schmitz *et al.*, 2008; Xu *et al.*, 2015).

343 Another important step in epigenetic control of gene expression is the ATP-dependent  
344 restructuring of nucleosomes (Vignali *et al.*, 2000). Phosphorylation of two homologous  
345 SWI2/SNF2 class of chromatin remodelling ATPases, TraesCS7D01G206700.3 (at T2492)  
346 and TraesCS7B01G110600.1 (at S1668 and S1671), was massively induced by heat

347 **(Supplementary Table S6)**. The *Arabidopsis* homologue, SPLAYED (SYD), is known to be  
348 a co-repressor during floral transition (Wagner and Meyerowitz, 2002). In contrast,  
349 phosphorylation of S1728 in the SNF2 ATPase TraesCS6B01G048200.2 is 1.7-fold  
350 downregulated **(Supplementary Table S7)**. Its homologue in *Arabidopsis*, BRAHMA  
351 (BRM) plays a pivotal role in controlling flowering time by regulating the expression of *FLC*  
352 and inflorescence architecture, mainly via interaction with the transcription factor KNAT1  
353 (Zhao *et al.*, 2015). Interestingly, a wheat homologue of KNAT1, TraesCS5B01G410600.1,  
354 was also less phosphorylated at high temperature **(Supplementary Table S7)**.

355 In conclusion, our data suggested that an increase in ambient temperature can alter  
356 phosphorylation status of chromatin remodelling proteins as an important mechanism to  
357 control gene expression during the reproductive stage. Further, other proteins involved in  
358 pollen, pistil or gametophyte development **(Supplementary Tables S6 and S7)** also exhibit  
359 altered phosphorylation in response to increased temperature.

360

### 361 *Comparison of Leaf and Spikelet Phosphoproteome*

362

363 In total, we identified 2491 identical phosphosites in both organs, which account for 48% and  
364 35% of all identified phosphosites in leaf and spikelet samples, respectively **(Figure 5)**. Only  
365 7 phosphosites were found commonly upregulated at high temperature in both organs and 8  
366 were commonly downregulated in both organs **(Figure 5 and Supplementary Table S8)**.  
367 Notwithstanding the considerable overlap between the phosphosites identified in both organs,  
368 the limited overlap between similarly regulated phosphosites indicated distinct responses in  
369 the leaf and spikelet phosphoproteomes at the early stages of thermal signalling.

370 Among the common higher temperature-induced phosphosites, phosphorylation of  
371 S464 of the pseudouridine synthase TraesCS2B01G177000.1 was increased 1.6-fold and 1.9-

372 fold in leaf and spikelet samples, respectively. Pseudouridylation of mRNA as well as of non-  
373 coding RNAs can be induced in stress conditions and is important for the regulation of gene  
374 expression, and involved in splicing, translation and decay of mRNA (Karijolic *et al.*, 2015).  
375 On the other hand, three different translation initiation factors are present among the  
376 commonly regulated proteins with downregulated phosphosites (**Supplementary Table S8**).  
377 This is in agreement with heat stress-triggered overall pausing of translation elongation, and  
378 with heat-induced HSP70 protecting cells from heat shock-induced pausing (Shalgi *et al.*,  
379 2014; Merret *et al.*, 2015). Especially, dephosphorylation of translation initiation factors  
380 correlates with the reprogramming of translation following thermal stress in wheat (Gallie *et*  
381 *al.*, 1997).

382

### 383 *Leaf and Spikelet Phosphoproteome Motif-X Analyses Reveal Distinct Regulation of* 384 *Phosphorylation Motifs*

385

386 So far, little is known about the protein kinases and phosphatases involved in temperature  
387 signalling (Ding *et al.*, 2015; Yu *et al.*, 2017; Li *et al.*, 2017; Zhao *et al.*, 2017). Therefore, we  
388 used the identified phosphosites to reveal potential phosphorylation motifs and associated  
389 kinases that may act in a high-temperature responsive manner. The Motif-X algorithm was  
390 applied on the set of regulated phosphosites in leaf and spikelet samples separately, using the  
391 sequences of all identified phosphoproteins in either organ as reference (**Figure 6**). In the  
392 spikelet, the common SP motif was enriched in both upregulated as well as downregulated  
393 phosphosites. This suggested that kinases (and phosphatases) targeting those sites are tightly  
394 regulating the protein phosphorylation signatures (meaning the specific combination of  
395 phosphorylated and non-phosphorylated residues), which impacts on overall protein  
396 behaviour, such as protein activity and localization (Salazar and Höfer, 2009). The acidic SD



397 motif was significantly overrepresented among the upregulated phosphosites (3.61-fold). In  
398 contrast, the downregulated phosphosites showed an enrichment in the basic RxxS motif  
399 (4.37-fold) (**Figure 6**). This latter trend was also found in the leaf samples (**Figure 6**). Despite  
400 that no motif enrichment was obtained for the upregulated phosphosites in leaf, due to the  
401 small size of the data set, we identified six SD motifs among these sites, which account for  
402 13% of the upregulated phosphosites in leaves. This was comparable with 14% of the  
403 upregulated phosphosites in the spikelet samples which also shows the SD motif. This  
404 possibly indicated a common molecular mechanism of higher temperature response via  
405 phosphorylation across different organs and different growth stages. While local intracellular  
406 parameters such as the pH can slightly vary in a temperature-dependent manner and thus  
407 affect the property of amino acid residues around the phosphosites (Wilkinson, 1999;  
408 Schönichen *et al.*, 2013), we do not rule out the possibility that certain phosphosites are  
409 targeted by a specific set of higher temperature-activated kinases. The acidic motif SD is  
410 known to be targeted by MAP kinases (MPKs), receptor-like kinases (RLKs) and calcium-  
411 dependent protein kinases (CDPKs), while RxxS is a motif commonly targeted by MAP  
412 kinase kinases (M2Ks) (van Wijk *et al.*, 2014). In support of this, we found 6 RLKs among 10  
413 kinases with a higher phosphorylation level at 34°C in the ear, whereas 3 out of 7 kinases with  
414 decreased phosphorylation level are predicted to have MAP3K or MAP4K activity  
415 (**Supplementary Table S9**).

416

#### 417 **Phosphoproteins with multiple deregulated phosphosites**

418

419 Since the protein phosphosignature will determine protein behaviour (Salazar and Höfer,  
420 2009), we probed the leaf and spikelet phosphoproteome data for proteins that displayed a  
421 combination of up and down-regulated phosphosites. We found 13 phosphoproteins in the

422 spikelet samples and one in the leaf samples that contained both significantly up and  
423 downregulated phosphosites (**Table 1**). It is thus very likely that the status of these  
424 phosphosites is not affected by changes in the protein level, but rather by higher temperature-  
425 dependent activity of associated kinases and phosphatases. These protein phosphatases and  
426 kinases might be activated by higher temperature and target the phosphosites independently to  
427 generate different phosphoforms of the target protein (**Figure 7A**). However, the  
428 phosphorylation and dephosphorylation events might also occur in an interdependent manner  
429 upon higher temperature (**Figure 7B**) (Salazar and Höfer, 2009; Nishi *et al.*, 2015). Crosstalk  
430 between different or the same type of PTMs is very common (Beltrao *et al.*, 2013; Nishi *et al.*,  
431 2015), but is still not widely explored in plants.

432 A complex example is the putative protein kinase TraesCS6B01G377500.3 (**Table 1**),  
433 which exhibited two phosphosites S711 and S762 that are, respectively, 2.6- and 2.1-fold  
434 upregulated in the spikelet samples treated at 34°C. In contrast, a doubly phosphorylated  
435 peptide (DFPI $p$ SPSpSAR, S227 and S230) was detected 2.5-fold higher in the 21°C samples.  
436 Further, a single peptide ( $p$ SSGIETTPAEAEALSK or SpSGIETTPAEAEALSK) could only  
437 be detected for all 21°C samples, albeit the phosphosite could not be exactly localized (either  
438 S768 or S769).

439 In addition, we also found proteins with multiple phosphosites that showed the same  
440 deregulation across different temperature (**Supplementary Table S10**). A large portion of  
441 these sites are detected together on the multi-phosphorylated peptides. These phosphosites  
442 may work synergistically to control the protein function at elevated temperature or may  
443 generate a phosphorylation code for crosstalk between different protein kinases or  
444 phosphatases as discussed above. However, in this case, a change in protein level may result  
445 in a general change in abundance of phosphopeptide pool. Hence, studying the co-regulation

446 of these phosphosites will require additional investigation on the abundance of the proteins,  
447 e.g. by analysing intact proteins or rather the different proteoforms.

448 Altogether, our data indicated that multiple phosphorylation/dephosphorylation events  
449 of a single protein induced by stress are common and add another level of complexity to our  
450 understanding of stress signalling mechanisms in plants.

451

#### 452 **Temperature-induced interconversion of neighbouring phosphorylation residues**

453

454 Interestingly, in the spikelet samples, TraesCS5B01G387800.1 (**Table 1**), which is a  
455 homologue of the WD40/BEACH domain protein SPIRRIG in *Arabidopsis thaliana*,  
456 exhibited two phosphosites in close proximity with opposite differential regulation upon high  
457 temperature. The phosphosite S3236 (**p**SPTTTYGGPGLDVQTLEYR) could only be detected  
458 at 34°C, whereas the phosphosite T3238 (SP**p**TTYGGPGLDVQTLEYR) could only be  
459 detected at 21°C (**Supplementary Figure 4**). The phosphosites are located in the WD40-  
460 repeat domain (**Figure 8A**), which is crucial for interaction of SPIRRIG with the decapping  
461 protein DCP1 to regulate mRNA decay upon salt stress in *Arabidopsis* (Steffens *et al.*, 2015).

462 Inspecting the protein sequence, we found the two phosphorylation sites localized in a  
463 sequence window of 10 amino acids of which four are either Ser or Thr (**Figure 8B**). Neither  
464 phosphorylation of the two other Thr residues or a hyper-phosphorylated species of the same  
465 peptide could be detected. Hence, a combined effect of phosphorylation of individual sites is  
466 likely not relevant. While S3236 was conserved and T3238 not conserved among SPIRRIG  
467 homologues, we could also find high frequency of Ser and Thr residues in the same sequence  
468 windows in other seed plants (**Figure 8B**). While the high occurrence of phosphorylatable  
469 sites might help to preserve the functional phosphorylation pool of a particular sequence  
470 during evolution, we suspect that the conformational change of the protein upon stimuli such

471 as heat could lead to the preference for one phosphosite over the other by the same kinase.  
472 This might provide a buffering mechanism to maintain the function of the protein by  
473 differential phosphorylation of neighbouring amino acid residues depending on the  
474 environmental conditions. However, we also do not rule out allosteric or orthosteric  
475 regulation between the two phosphosites that might affect the activity of the protein  
476 (Nussinov *et al.*, 2012).

477 For the splicing factor TraesCS2D01G281200.1 (**Table 1**) the phosphorylated peptide  
478 containing only S12 (ASAETLARSP

S

REPSSDPPR) is uniquely detected at 34°C, while the  
479 doubly phosphorylated peptide of S10 and S12 (ASAETLAR

S

P

S

REPSSDPPR) was 3.4-  
480 fold downregulated at the same temperature in the spikelets. We speculate that the  
481 phosphoforms of TraesCS2D01G281200.1 may co-exist in a temperature-dependent  
482 stoichiometry.

483 Such interconversion of neighbouring phosphorylation residues (**Figure 8C**) has until  
484 now seldom been observed. One example can be found in the cyanobacteria *Synechococcus*  
485 *elongates*, where the circadian clock is controlled by the oscillating phosphorylation  
486 equilibrium between a neighbour serine and threonine in the protein kinase KaiC (Rust *et al.*,  
487 2007). This phosphorylation switch between the two residues is modulated by the  
488 stoichiometric interaction of KaiC with KaiA and KaiB, in which the pS-KaiC form  
489 antagonize KaiA activity, whereas the pT-KaiC form does not. Similarly, a dual  
490 phosphorylation switch has been studied in human (Kilisch *et al.*, 2016). To our knowledge,  
491 similar phosphorylation modules have not been reported in plants, especially not in the  
492 context of stress responses. It is possible that temperature serves as a signalling switch for  
493 such a phosphorylation toggle via regulated interaction with at least a protein kinase and/or  
494 phosphatase.

495

496 **CONCLUSION**

497

498 In conclusion, we provide the scientific community with the first large scale  
499 phosphoproteome in plants under the control of higher ambient temperature across different  
500 temperature-sensitive organs. An in-depth analysis showed that the photosynthetic machinery  
501 in the leaf is highly responsive to increased temperature, while epigenetic regulation in the  
502 spikelets seems to be tightly regulated by higher temperature in a phosphorylation-dependent  
503 manner during reproductive development. Furthermore, we observed a core set of common  
504 proteins between both leaf and spikelet, suggesting some conserved mechanisms in these  
505 organs when responding the higher temperature. Nevertheless, we also observed a large  
506 portion of organ-specific regulation. Finally, we exposed a, so far, not reported mechanism of  
507 interconversion of neighbouring phosphorylation residues, which likely plays a key role in  
508 temperature signalling. Taken together, our data set increases the understanding of  
509 temperature signalling in plants.

510

511 **SUPPLEMENTARY DATA**

512

513 **Table S1** Primers used in this study

514 **Table S2** Phosphosites identified in wheat leaves

515 **Table S3** Phosphosites identified in wheat spikelets

516 **Table S4** Phosphosites uniquely present at either 24 °C or 34 °C in wheat leaves

517 **Table S5** Phosphosites significantly deregulated at 34 °C (Students' t-test  $p < 0.01$ ) in wheat  
518 leaves

519 **Table S6** Phosphosites uniquely present at either 21 °C or 34 °C in wheat spikelets

520 **Table S7** Phosphosites significantly deregulated at 34 °C (Students' t-test  $p < 0.01$ ) in wheat  
521 spikelets

522 **Table S8** Phosphosites that is commonly upregulated or downregulated at 34 °C in both  
523 leaves and spikelets

524 **Table S9** Kinases with deregulated phosphosites in this study

525 **Table S10** List of proteins with multiple upregulated or multiple downregulated phosphosites

526

527 **Figure S1** Histograms show normal distribution of Log<sub>2</sub> Intensity of quantifiable proteins  
528 (proteins present in only one of two temperatures or having at least 2 valid values per  
529 temperature) in leaf (A) and spikelet (B)

530 **Figure S2** Overpresented GO terms for molecular functions among leaf proteins with (A)  
531 upregulated or (B) downregulated phosphosites. Fold-changes are indicated.

532 **Figure S3** Overpresented GO terms for molecular functions among spikelet proteins with (A)  
533 upregulated or (B) downregulated phosphosites. Fold-changes are indicated.

534 **Figure S4** Mass spectrum of phosphopeptides containing S3236 (A) and T3238 (B) in  
535 SPIRRIG homologue TraesCS5B01G387800.1.

536

## 537 **ACKNOWLEDGEMENTS**

538

539 We thank Michiel Van Bel for assistance in depositing the data in the PTMViewer. We thank  
540 Natalia Nikonorova for fruitful discussions on MS data analyses. L.D.V. is the recipient of a

541 VIB International PhD program fellowship. T.Z. is supported by a grant from the Chinese  
542 Scholarship Council.

543

## 544 REFERENCES

545

546 **Akter N, Rafiqul Islam M.** 2017. Heat stress effects and management in wheat. A review.

547 *Agronomy for Sustainable Development* **37**, 37.

548 **Arnold K, Bordoli L, Kopp J, Schwede T.** 2006. The SWISS-MODEL workspace: a web-

549 based environment for protein structure homology modelling. *Bioinformatics* **22**, 195–201.

550 **Asseng S, Ewert F, Martre P, et al.** 2015. Rising temperatures reduce global wheat

551 production. *Nature Climate Change* **5**, 143–147.

552 **Barber HM, Carney J, Alghabari F, Gooding MJ.** 2015. Decimal growth stages for

553 precision wheat production in changing environments? *Annals of Applied Biology* **166**, 355–

554 371.

555 **Beltrao P, Bork P, Krogan NJ, Van Noort V.** 2013. Evolution and functional cross-talk of

556 protein post-translational modifications. *Molecular Systems Biology* **9**, 1–13.

557 **Bennett MD, Chapman V, Riley R.** 1971. The duration of meiosis in pollen mother cells of

558 wheat, rye and Triticale. *Proceedings of the Royal Society London. Series B, Biological*

559 *Sciences* **178**, 259–275.

560 **Biasini M, Bienert S, Waterhouse A, et al.** 2014. SWISS-MODEL: modelling protein

561 tertiary and quaternary structure using evolutionary information. *Nucleic Acids Research* **42**,

562 W252–W258.

563 **Bonhomme L, Valot B, Tardieu F, Zivy M.** 2012. Phosphoproteome Dynamics Upon

564 Changes in Plant Water Status Reveal Early Events Associated With Rapid Growth

565 Adjustment in Maize Leaves. *Molecular & Cellular Proteomics* **11**, 957–972.

- 566 **Brenchley R, Spannagl M, Pfeifer M, et al.** 2012. Analysis of the bread wheat genome  
567 using whole-genome shotgun sequencing. *Nature* **491**, 705–710.
- 568 **Cherkasov V, Grousl T, Theer P, et al.** 2015. Systemic control of protein synthesis through  
569 sequestration of translation and ribosome biogenesis factors during severe heat stress. *FEBS*  
570 *Letters* **589**, 3654–3664.
- 571 **Chou MF, Schwartz D.** 2011. Biological Sequence Motif Discovery Using *motif-x*. *Current*  
572 *Protocols in Bioinformatics*, 1–24.
- 573 **Ding Y, Li H, Zhang X, Xie Q, Gong Z, Yang S.** 2015. OST1 kinase modulates freezing  
574 tolerance by enhancing ICE1 stability in Arabidopsis. *Developmental cell* **32**, 278–89.
- 575 **Draeger T, Moore G.** 2017. Short periods of high temperature during meiosis prevent normal  
576 meiotic progression and reduce grain number in hexaploid wheat (*Triticum aestivum* L.).  
577 *Theoretical and Applied Genetics* **130**, 1785–1800.
- 578 **Dutta S, Mohanty S, Tripathy BC.** 2009. Role of Temperature Stress on Chloroplast  
579 Biogenesis and Protein Import in Pea. *Plant Physiology* **150**, 1050–1061.
- 580 **Farooq M, Bramley H, Palta JA, Siddique KHM.** 2011. Heat Stress in Wheat during  
581 Reproductive and Grain-Filling Phases. *Critical Reviews in Plant Sciences* **30**, 491–507.
- 582 **Fischer RA.** 1985. Number of kernels in wheat crops and the influence of solar radiation and  
583 temperature. *J. agric. Sci., Camb* **105**, 447–461.
- 584 **Gallie DR, Le H, Tanguay RL, Hoang NX, Browning KS, Caldwell C.** 1997. Molecular  
585 Genetics: The Phosphorylation State of Translation Initiation Factors Is Regulated  
586 Developmentally and following Heat Shock in Wheat. *Journal of Biological Chemistry* **272**,  
587 2–10.
- 588 **Gan E-S, Huang J, Ito T.** 2013. Functional Roles of Histone Modification, Chromatin  
589 Remodeling and MicroRNAs in Arabidopsis Flower Development. *International Review of*  
590 *Cell and Molecular Biology* **305**, 115–161.



- 591 **Gupta K, Sengupta A, Chakraborty M, Gupta B.** 2016. Hydrogen Peroxide and  
592 Polyamines Act as Double Edged Swords in Plant Abiotic Stress Responses. *Frontiers in plant*  
593 *science* **7**, 1343.
- 594 **Guy C, Kaplan F, Kopka J, Selbig J, Hinch DK.** 2008. Metabolomics of temperature  
595 stress. *Physiologia Plantarum* **132**, 220–235.
- 596 **Hashiguchi A, Komatsu S.** 2016. Impact of Post-Translational Modifications of Crop  
597 Proteins under Abiotic Stress. *Proteomes* **4**.
- 598 **Hawkesford MJ, Araus JL, Park R, Calderini D, Miralles D, Shen T, Zhang J, Parry**  
599 **MAJ.** 2013. Prospects of doubling global wheat yields. *Food and Energy Security* **2**, 34–48.
- 600 **Hedhly A, Hormaza JI, Herrero M.** 2009. Global warming and sexual plant reproduction.  
601 *Trends in Plant Science* **14**, 30–36.
- 602 **Hofmann NR, Theg SM.** 2005. Chloroplast outer membrane protein targeting and insertion.  
603 *Trends in Plant Science* **10**, 450–457.
- 604 **International Wheat Genome Sequencing Consortium (IWGSC).** 2014. A chromosome-  
605 based draft sequence of the hexaploid bread wheat (*Triticum aestivum*) genome. *Science*  
606 (New York, N.Y.) **345**, 1251788.
- 607 **International Wheat Genome Sequencing Consortium (IWGSC).** 2014. A chromosome-  
608 based draft sequence of the hexaploid bread wheat ( *Triticum aestivum* ) genome Ancient  
609 hybridizations among the ancestral genomes of bread wheat Genome interplay in the grain  
610 transcriptome of hexaploid bread wheat Structural and functional pa. *Science* (New York,  
611 N.Y.) **345**, 1250092.
- 612 **Kanshin E, Kubiniok P, Thattikota Y, D'Amours D, Thibault P.** 2015. Phosphoproteome  
613 dynamics of *Saccharomyces cerevisiae* under heat shock and cold stress. *Molecular systems*  
614 *biology* **11**, 813.
- 615 **Karijolich J, Yi C, Yu YT.** 2015. Transcriptome-wide dynamics of RNA pseudouridylation.

- 616 Nature Reviews Molecular Cell Biology **16**, 581–585.
- 617 **Kilisch M, Lytovchenko O, Arakel EC, Bertinetti D, Schwappach B.** 2016. A dual  
618 phosphorylation switch controls 14-3-3-dependent cell surface expression of TASK-1. Journal  
619 of Cell Science **129**, 831–842.
- 620 **Kim DH, Park M-J, Gwon GH, et al.** 2014. An Ankyrin Repeat Domain of AKR2 Drives  
621 Chloroplast Targeting through Coincident Binding of Two Chloroplast Lipids. Developmental  
622 Cell **30**, 598–609.
- 623 **Kline KG, Barrett-Wilt GA, Sussman MR.** 2010. In planta changes in protein  
624 phosphorylation induced by the plant hormone abscisic acid. Proceedings of the National  
625 Academy of Sciences **107**, 15986–15991.
- 626 **Kotak S, Larkindale J, Lee U, von Koskull-Döring P, Vierling E, Scharf KD.** 2007.  
627 Complexity of the heat stress response in plants. Current Opinion in Plant Biology **10**, 310–  
628 316.
- 629 **Kumar V, Khare T, Sharma M, Wani S.** 2017. Engineering Crops for Future: A  
630 Phosphoproteomics Approach. Current Protein & Peptide Science **18**, 1–1.
- 631 **Laino P, Shelton D, Finnie C, De Leonardis AM, Mastrangelo AM, Svensson B,**  
632 **Lafiandra D, Masci S.** 2010. Comparative proteome analysis of metabolic proteins from  
633 seeds of durum wheat (cv. Svevo) subjected to heat stress. Proteomics **10**, 2359–68.
- 634 **Lamberti G, Gügel IL, Meurer J, Soll J, Schwenkert S.** 2011. The Cytosolic Kinases  
635 STY8, STY17, and STY46 Are Involved in Chloroplast Differentiation in Arabidopsis. Plant  
636 Physiology **157**, 70–85.
- 637 **Lawrence M, Daujat S, Schneider R.** 2016. Lateral Thinking: How Histone Modifications  
638 Regulate Gene Expression. Trends in Genetics **32**, 42–56.
- 639 **Li H, Ding Y, Shi Y, Zhang X, Zhang S, Gong Z, Yang S.** 2017. MPK3- and MPK6-  
640 Mediated ICE1 Phosphorylation Negatively Regulates ICE1 Stability and Freezing Tolerance

- 641 in Arabidopsis. *Developmental cell* **43**, 630–642.e4.
- 642 **Ling Q, Jarvis P.** 2016. Analysis of Protein Import into Chloroplasts Isolated from Stressed  
643 Plants. *Journal of Visualized Experiments*.
- 644 **Liu Z, Xin M, Qin J, Peng H, Ni Z, Yao Y, Sun Q.** 2015. Temporal transcriptome profiling  
645 reveals expression partitioning of homeologous genes contributing to heat and drought  
646 acclimation in wheat (*Triticum aestivum* L.). *BMC Plant Biology* **15**, 1–20.
- 647 **Luo MC, Gu YQ, Puiu D, et al.** 2017. Genome sequence of the progenitor of the wheat D  
648 genome *Aegilops tauschii*. *Nature* **551**, 498–502.
- 649 **Majoul T, Bancel E, Tribou E, Ben Hamida J, Branlard G.** 2003. Proteomic analysis of the  
650 effect of heat stress on hexaploid wheat grain: Characterization of heat-responsive proteins  
651 from total endosperm. *PROTEOMICS* **3**, 175–183.
- 652 **Merret R, Nagarajan VK, Carpentier MC, et al.** 2015. Heat-induced ribosome pausing  
653 triggers mRNA co-translational decay in *Arabidopsis thaliana*. *Nucleic Acids Research* **43**,  
654 4121–4132.
- 655 **Mochida K, Shinozaki K.** 2013. Unlocking triticeae genomics to sustainably feed the future.  
656 *Plant and Cell Physiology* **54**, 1931–1950.
- 657 **Nguyen THN, Brechenmacher L, Aldrich JT, et al.** 2012. Quantitative Phosphoproteomic  
658 Analysis of Soybean Root Hairs Inoculated with *Bradyrhizobium japonicum*. *Molecular &*  
659 *Cellular Proteomics* **11**, 1140–1155.
- 660 **Nishi H, Demir E, Panchenko AR.** 2015. Crosstalk between Signaling Pathways Provided  
661 by Single and Multiple Protein Phosphorylation Sites. *Journal of Molecular Biology* **427**,  
662 511–520.
- 663 **Nussinov R, Tsai CJ, Xin F, Radivojac P.** 2012. Allosteric post-translational modification  
664 codes. *Trends in Biochemical Sciences* **37**, 447–455.
- 665 **Oikawa K, Yamasato A, Kong S-G, Kasahara M, Nakai M, Takahashi F, Ogura Y,**

- 666 **Kagawa T, Wada M.** 2008. Chloroplast Outer Envelope Protein CHUP1 Is Essential for  
667 Chloroplast Anchorage to the Plasma Membrane and Chloroplast Movement. *Plant*  
668 *Physiology* **148**, 829–842.
- 669 **Pflum MKH, Tong JK, Lane WS, Schreiber SL.** 2001. Histone Deacetylase 1  
670 Phosphorylation Promotes Enzymatic Activity and Complex Formation. *Journal of Biological*  
671 *Chemistry* **276**, 47733–47741.
- 672 **Porter JR, Gawith M.** 1999. Temperatures and the growth and development of wheat: a  
673 review. *European Journal of Agronomy* **10**, 23–36.
- 674 **Qi X, Xu W, Zhang J, Guo R, Zhao M, Hu L, Wang H, Dong H, Li Y.** 2017.  
675 Physiological characteristics and metabolomics of transgenic wheat containing the maize  
676 C4phosphoenolpyruvate carboxylase (PEPC) gene under high temperature stress. *Protoplasma*  
677 **254**, 1017–1030.
- 678 **Rampitsch C, Bykova N V.** 2012. The beginnings of crop phosphoproteomics: exploring  
679 early warning systems of stress. *Frontiers in Plant Science* **3**, 1–15.
- 680 **Rizhsky L.** 2004. When Defense Pathways Collide. The Response of Arabidopsis to a  
681 Combination of Drought and Heat Stress. *Plant Physiology* **134**, 1683–1696.
- 682 **Ruan Y-L, Jin Y, Yang Y-J, Li G-J, Boyer JS.** 2010. Sugar Input, Metabolism, and  
683 Signaling Mediated by Invertase: Roles in Development, Yield Potential, and Response to  
684 Drought and Heat. *Molecular Plant* **3**, 942–955.
- 685 **Rust MJ, Markson JS, Lane WS, Fisher DS, O’Shea EK.** 2007. Ordered Phosphorylation  
686 Governs Oscillation of a Three-Protein Circadian Clock. *Science* **318**, 809–812.
- 687 **Sainiab HS, Sedgleyc M, Aspinalla D.** 1983. Effect of Heat Stress during Floral  
688 Development on Pollen Tube Growth and Ovary Anatomy in Wheat ( *Triticum aestivum* L .).  
689 *Australian Journal of Physiology* **10**, 137–144.
- 690 **Saini HS, Sedgley M, Aspinall D.** 1984. Developmental Anatomy in Wheat of Male Sterility

- 691 Induced by Heat Stress, Water Deficit or Abscisic Acid. *Aust. J. Plant Physiol* **11**, 243–253.
- 692 **Salazar C, Höfer T.** 2009. Multisite protein phosphorylation - from molecular mechanisms to  
693 kinetic models. *FEBS Journal* **276**, 3177–3198.
- 694 **Scalabrin E, Radaelli M, Rizzato G, Bogani P, Buiatti M, Gambaro A, Capodaglio G.**  
695 2015. Metabolomic analysis of wild and transgenic *Nicotiana langsdorffii* plants exposed to  
696 abiotic stresses: Unraveling metabolic responses. *Analytical and Bioanalytical Chemistry* **407**,  
697 6357–6368.
- 698 **Schmitz RJ, Tamada Y, Doyle MR, Zhang X, Amasino RM.** 2008. Histone H2B  
699 Deubiquitination Is Required for Transcriptional Activation of FLOWERING LOCUS C and  
700 for Proper Control of Flowering in Arabidopsis. *PLANT PHYSIOLOGY* **149**, 1196–1204.
- 701 **Schönichen A, Webb BA, Jacobson MP, Barber DL.** 2013. Considering Protonation as a  
702 Posttranslational Modification Regulating Protein Structure and Function. *Annual Review of*  
703 *Biophysics* **42**, 289–314.
- 704 **Shalgi R, Hurt JA, Krykbaeva I, Taipale M, Lindquist S, Burge CB.** 2014. Widespread  
705 inhibition of posttranscriptional splicing shapes the cellular transcriptome following heat  
706 shock. **49**, 439–452.
- 707 **Steffens A, Bräutigam A, Jakoby M, Hülskamp M.** 2015. The BEACH Domain Protein  
708 SPIRRIG Is Essential for Arabidopsis Salt Stress Tolerance and Functions as a Regulator of  
709 Transcript Stabilization and Localization (X Chen, Ed.). *PLOS Biology* **13**, e1002188.
- 710 **Strittmatter P, Soll J, Bölter B.** 2010. The chloroplast protein import machinery: a review.  
711 *Methods in molecular biology* **619**, 307–21.
- 712 **Sun W, Van Montagu M, Verbruggen N.** 2002. Small heat shock proteins and stress  
713 tolerance in plants. *Biochimica et Biophysica Acta (BBA) - Gene Structure and Expression*  
714 **1577**, 1–9.
- 715 **Thingholm TE, Jensen ON, Larsen MR.** 2009. Analytical strategies for

- 716 phosphoproteomics. *Proteomics* **9**, 1451–1468.
- 717 **Vignali M, Hassan AH, Neely KE, Workman JL.** 2000. ATP-Dependent Chromatin-  
718 Remodeling Complexes. *Molecular and Cellular Biology* **20**, 1899–1910.
- 719 **Vizcaíno JA, Csordas A, Del-Toro N, et al.** 2016. 2016 update of the PRIDE database and  
720 its related tools. *Nucleic Acids Research* **44**, D447–D456.
- 721 **Vizcaíno et al.** 2014. ProteomeXchange provides globally co-ordinated proteomics data  
722 submission and dissemination. **32**, 223–226.
- 723 **Vu LD, Stes E, Van Bel M, Nelissen H, Maddelein D, Inzé D, Coppens F, Martens L,**  
724 **Gevaert K, De Smet I.** 2016. Up-to-Date Workflow for Plant (Phospho)proteomics Identifies  
725 Differential Drought-Responsive Phosphorylation Events in Maize Leaves. *Journal of*  
726 *proteome research* **15**, 4304–4317.
- 727 **Vu LD, Verstraeten I, Stes E, Van Bel M, Coppens F, Gevaert K, De Smet I.** 2017.  
728 Proteome Profiling of Wheat Shoots from Different Cultivars. *Frontiers in Plant Science* **8**, 1–  
729 11.
- 730 **Wagner D, Meyerowitz EM.** 2002. SPLAYED, a Novel SWI/SNF ATPase Homolog,  
731 Controls Reproductive Development in Arabidopsis. *Current Biology* **12**, 85–94.
- 732 **Wang X, Xin C, Cai J, Zhou Q, Dai T, Cao W, Jiang D.** 2016. Heat Priming Induces  
733 Trans-generational Tolerance to High Temperature Stress in Wheat. *Frontiers in Plant Science*  
734 **7**, 1–12.
- 735 **Wardlaw IF, Dawson I a., Munibi P, Fewster R.** 1989. The Tolerance of Wheat to High  
736 Temperatures Survey Procedures and General Response Patterns. *Australian Journal of*  
737 *Agriculture Research* **40**, 1–13.
- 738 **van Wijk KJ, Friso G, Walther D, Schulze WX.** 2014. Meta-Analysis of Arabidopsis  
739 thaliana Phospho-Proteomics Data Reveals Compartmentalization of Phosphorylation Motifs.  
740 *The Plant cell* **26**, 2367–2389.

- 741 **Wilkinson S.** 1999. pH as a stress signal. *Plant Growth Regulation* **29**, 87–99.
- 742 **Wu X, Gong F, Cao D, Hu X, Wang W.** 2016. Advances in crop proteomics: PTMs of  
743 proteins under abiotic stress. *Proteomics* **16**, 847–65.
- 744 **Xu D, Shan B, Lee B-H, et al.** 2015. Phosphorylation and activation of ubiquitin-specific  
745 protease-14 by Akt regulates the ubiquitin-proteasome system. *eLife* **4**.
- 746 **Xu Y, Zhan C, Huang B.** 2011. Heat Shock Proteins in Association with Heat Tolerance in  
747 Grasses. *International Journal of Proteomics* **2011**, 1–11.
- 748 **Xue G-P, Sadat S, Drenth J, McIntyre CL.** 2014. The heat shock factor family from  
749 *Triticum aestivum* in response to heat and other major abiotic stresses and their role in  
750 regulation of heat shock protein genes. *Journal of Experimental Botany* **65**, 539–557.
- 751 **Yu J, Han J, Kim Y-J, et al.** 2017. Two rice receptor-like kinases maintain male fertility  
752 under changing temperatures. *Proceedings of the National Academy of Sciences of the United*  
753 *States of America* **114**, 12327–12332.
- 754 **Zhang M, Lv D, Ge P, Bian Y, Chen G, Zhu G, Li X, Yan Y.** 2014a. Phosphoproteome  
755 analysis reveals new drought response and defense mechanisms of seedling leaves in bread  
756 wheat (*Triticum aestivum* L.). *Journal of Proteomics* **109**, 290–308.
- 757 **Zhang M, Ma CY, Lv DW, Zhen SM, Li XH, Yan YM.** 2014b. Comparative  
758 phosphoproteome analysis of the developing grains in bread wheat (*Triticum aestivum* L.)  
759 under well-watered and water-deficit conditions. *Journal of Proteome Research* **13**, 4281–  
760 4297.
- 761 **Zhang Y, Pan J, Huang X, et al.** 2017. Differential effects of a post-anthesis heat stress on  
762 wheat (*Triticum aestivum* L.) grain proteome determined by iTRAQ. *Scientific Reports* **7**,  
763 3468.
- 764 **Zhao C, Wang P, Si T, et al.** 2017. MAP Kinase Cascades Regulate the Cold Response by  
765 Modulating ICE1 Protein Stability. *Developmental cell* **43**, 618–629.e5.

766 **Zhao M, Yang S, Chen C-Y, Li C, Shan W, Lu W, Cui Y, Liu X, Wu K.** 2015.

767 *Arabidopsis* BREVIPEDICELLUS Interacts with the SWI2/SNF2 Chromatin Remodeling

768 ATPase BRAHMA to Regulate KNAT2 and KNAT6 Expression in Control of Inflorescence

769 Architecture (X Chen, Ed.). PLOS Genetics **11**, e1005125.

770 **Zhu JK.** 2016. Abiotic Stress Signaling and Responses in Plants. Cell **167**, 313–324.

771

772

773

774

775

776

777

778

779

780

781

782

783

784

785

786

787

788

789

790



791 **FIGURE LEGENDS**

792

793 **Figure 1.** Different wheat cultivars and organs used in this study. **(A)** Fielder seedlings are  
794 depicted at 7 days after germination. Scale bar, 2.2 cm. **(B)** Cadenza spikelet (inset) is  
795 depicted from plants at the booting stage. Red asterisk indicates representative ear used for  
796 sampling. Scale bar, 7.5 cm. **(C-D)** Analysis of *HSP70* and *HSP90* expression in both leaf and  
797 ear as a proxy for the heat sensing shows a maximum increase at 60 min after transferring to  
798 high temperature.

799

800 **Figure 2.** Summary of the phosphoproteome analysis in wheat leaf and ear. T-test significant  
801 hits and phosphosites with valid values reproducibly present in only one condition in each  
802 organ are collectively analyzed and called as upregulated or downregulated phosphosites.

803

804 **Figure 3.** GO enrichment for biological process in upregulated (A) and downregulated (B)  
805 phosphoproteins in leaf samples. All identified leaf phosphosites were used as the background  
806 dataset. Fold change is indicated.

807

808 **Figure 4.** GO enrichment for biological process in upregulated (A) and downregulated (B)  
809 phosphoproteins in ear samples. All identified ear phosphosites were used as the background  
810 dataset. Fold change is indicated.

811

812 **Figure 5.** Venn diagrams showing the number of common identified phosphosites as well as  
813 deregulated phosphosites in leaf and ear samples.

814

815 **Figure 6.** Motif-X analysis show an enrichment of an acidic phosphomotif among  
816 upregulated phosphosites and of a basic motif among downregulated phosphosites in leaf and  
817 ear. Fold-change of the enrichment compared to the background dataset are indicated. N/A,  
818 not available.

819

820 **Figure 7.** Heat-dependent phosphorylation and dephosphorylation on a single target protein.

821 **(A)** Heat activates both the kinase and the phosphatase to target different Ser or Thr residues  
822 simultaneously, generating different phosphoforms of the protein. **(B)** First, heat activates the  
823 phosphatase or kinase. The dephosphorylation or phosphorylation of the protein serves as a  
824 crosstalk signal for a second kinase or phosphatase to operate, generating one single  
825 phosphoform of the protein.

826

827 **Figure 8.** **(A)** Structural model of the WD40 domain of *Triticum aestivum* SPIRRIG  
828 (TraesCS5B01G387800.1). The Ser/Thr rich sequence is highlighted in green showing the  
829 two phosphosites detected in the study. **(B)** Alignment of SPIRRIG homologues from  
830 different plant species. The Ser/Thr-rich window is marked with the Ser/Thr residues  
831 highlighted in yellow. Domain prediction was performed in Interpro  
832 ([www.ebi.ac.uk/interpro/](http://www.ebi.ac.uk/interpro/)). **(C)** Model of temperature-induced interconversion of neighboring  
833 phosphosites.

834

| Wheat ID                    | Upregulated                  | Fold change (upregulation)           | Downregulated              | Fold-change (downregulation)   | Arabidopsis homologues | Arabidopsis homologue description                                                                                  |
|-----------------------------|------------------------------|--------------------------------------|----------------------------|--------------------------------|------------------------|--------------------------------------------------------------------------------------------------------------------|
| <b>TraesCS2A01G209100.1</b> | T1371                        | 5.5                                  | S969                       | 2.7                            | AT3G60240              | CUM2, protein synthesis initiation factor 4G                                                                       |
| <b>TraesCS2D01G281200.1</b> | S12*                         | Unique for 34 °C                     | S12*<br>S10                | 3.4<br>3.4                     | AT5G51300              | ATSF1, nuclear localized splicing factor, involved in alternative splicing of some mRNAs.                          |
| <b>TraesCS3A01G538200.1</b> | S1297                        | Unique for 34 °C                     | S1126                      | 2.4                            | AT3G09670              | Tudor/PWWP/MBT superfamily protein                                                                                 |
| <b>TraesCS3B01G212100.3</b> | S771                         | Unique for 34 °C                     | T606                       | Unique for 21 °C               | AT5G21160              | LARP1a, involved in mRNA degradation in response to heat stress.                                                   |
| <b>TraesCS3D01G178100.1</b> | S5<br>S6                     | Unique for 34 °C<br>Unique for 34 °C | S203                       | 5.1                            | AT3G62330              | OXS2, zinc finger family protein                                                                                   |
| <b>TraesCS3D01G205900.4</b> | S648                         | Unique for 34 °C                     | S672                       | 1.6                            | AT3G06670              | SMEK1, forms complex with PP4 proteins to target and dephosphorylate HYL1 which in turn promotes miRNA biogenesis. |
| <b>TraesCS3D01G230600.1</b> | T4                           | Unique for 34 °C                     | S210                       | Unique for 21 °C               | AT1G60690              | NAD(P)-linked oxidoreductase                                                                                       |
| <b>TraesCS4D01G034300.1</b> | S152                         | 1.5                                  | S575                       | 3.5                            | AT2G41900              | CCCH-type zinc finger protein                                                                                      |
| <b>TraesCS5B01G387800.1</b> | S3236                        | Unique for 34 °C                     | T3238                      | Unique for 21 °C               | AT1G03060              | SPIRRIG, WD/BEACH domain protein                                                                                   |
| <b>TraesCS6B01G208900.5</b> | S363<br>T360                 | 2.0<br>2.0                           | S439                       | 1.5                            | AT3G63400              | Cyclophilin-like peptidyl-prolyl cis-trans isomerase                                                               |
| <b>TraesCS6B01G377500.3</b> | S711<br>S762                 | 2.6<br>2.1                           | S768 /S769<br>S227<br>S230 | Unique for 21 °C<br>2.5<br>2.5 | AT5G57610              | kinase superfamily protein                                                                                         |
| <b>TraesCS6D01G167200.1</b> | S791<br>S794<br>S348<br>T345 | 13.9<br>13.9<br>2.0<br>2.0           | S424                       | 1.5                            | AT3G63400              | Cyclophilin-like peptidyl-prolyl cis-trans isomerase                                                               |
| <b>TraesCS7B01G002900.1</b> | S460                         | Unique for 34 °C                     | S249                       | 3.41                           | AT5G43310              | COP1-interacting protein-like protein                                                                              |
| <b>TraesCS5A01G291600.1</b> | S572                         | Unique for 34 °C                     | S485<br>S486               | 1.38<br>1.38                   | AT2G33490              | hydroxyproline-rich glycoprotein family protein                                                                    |

**Table 1.** List of phosphoproteins exhibit multiple upregulated and downregulated phosphosites. For TraesCS2D01G281200.1, the peptide containing only phosphorylated S12 is upregulated and the doubly phosphorylated peptide (S12 and S10) is down regulated.

A

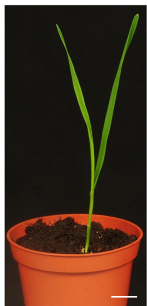

C

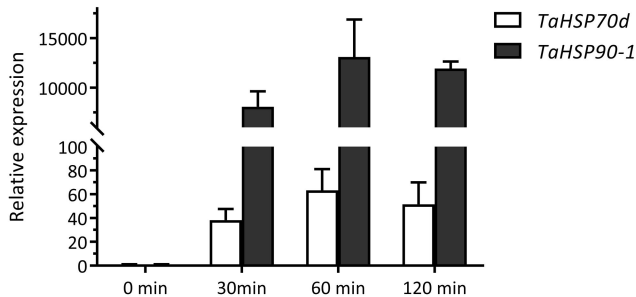

B

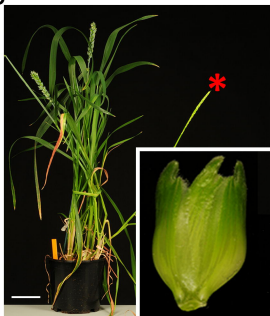

D

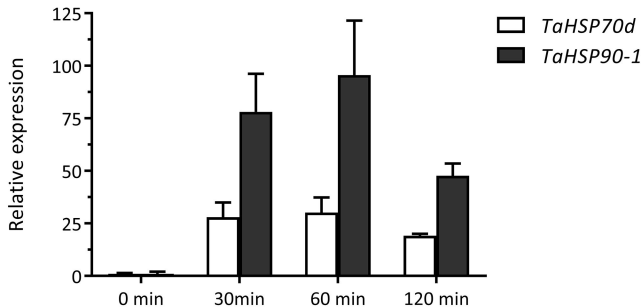

FIGURE 1

# LEAF

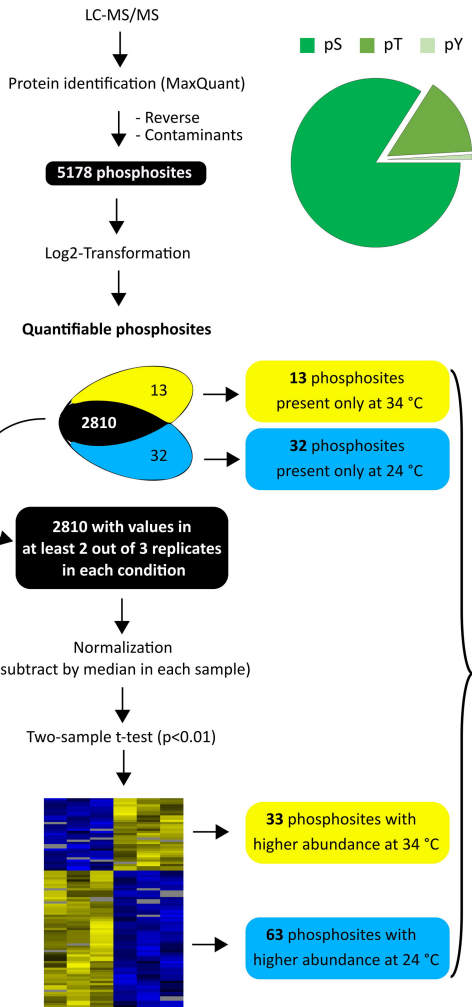

# EAR

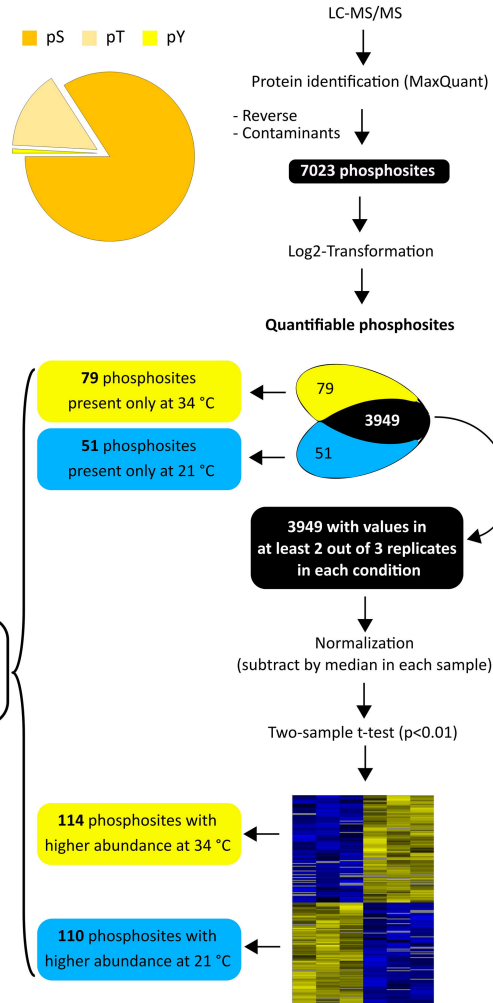

■ Upregulated phosphosites

■ Downregulated phosphosites

- NCBI blastp
- Protein mapping & annotation
- Pathway analysis

FIGURE 2

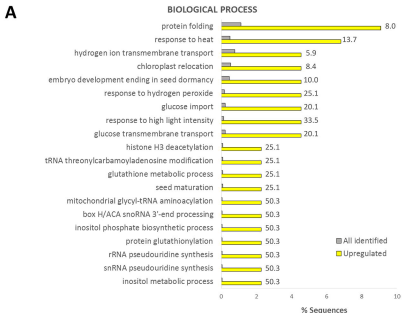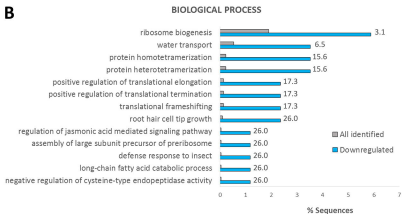

**FIGURE 3**

**A**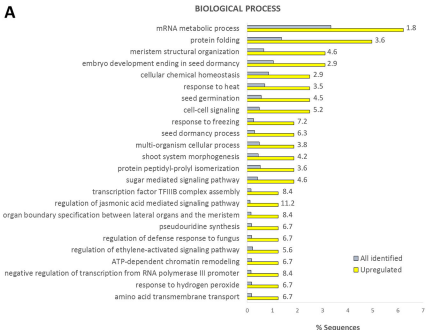**B**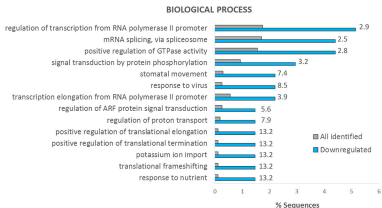**FIGURE 4**

**A****LEAF****EAR**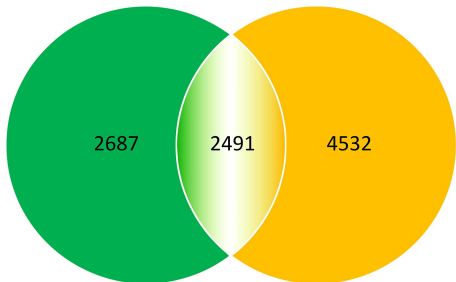**B****LEAF****EAR**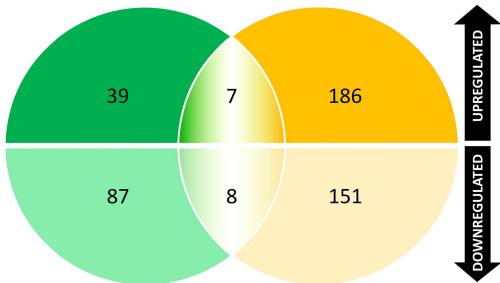**FIGURE 5**



UPREGULATED

DOWNREGULATED

EAR

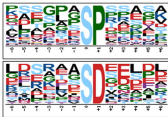

4.48

3.61

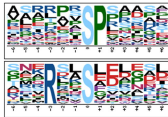

5.14

4.37

LEAF

N/A

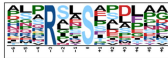

4.82

FIGURE 6

A

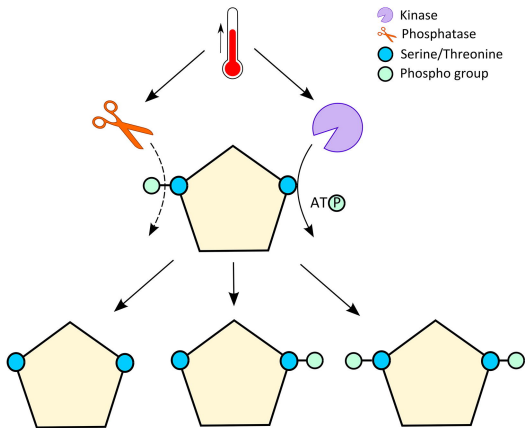

B

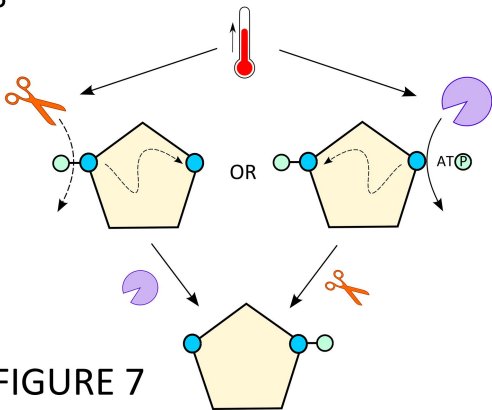

FIGURE 7

A

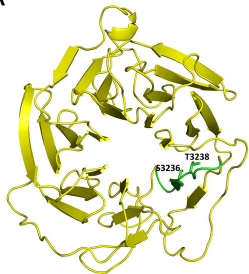

B

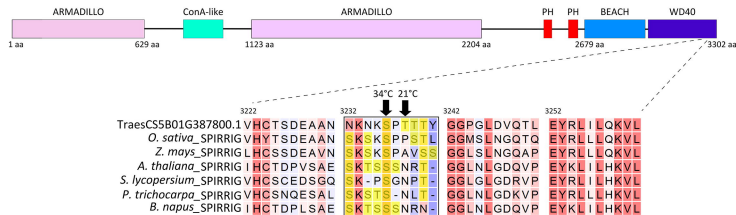

C

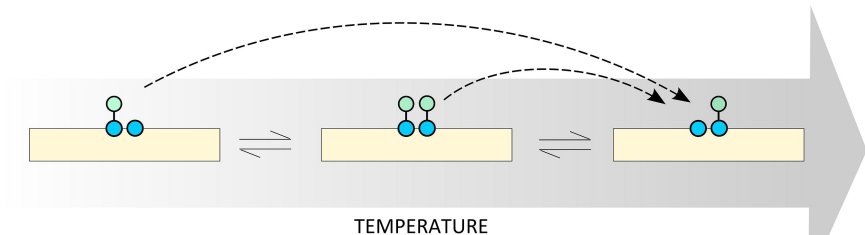

FIGURE 8
